# Supplementary material for: Binding of group 15 and group 16 oxides by a concave host containing an isophthalamide unit
Source: publisher site journal article supplement (doi:10.3762/bjoc.8.2), 2012-01-03
Supplement: Additional file 1 [file 1860-5397-8-2-S1.pdf]

# Supporting Information

for

## Binding of group 15 and group 16 oxides by a concave host containing an isophthalamide unit

Jens Eckelmann, Vittorio Saggiomo, Svenja Fischmann and Ulrich Lüning\*

Address: <sup>1</sup>Otto-Diels-Institut für Organische Chemie, Christian-Albrechts-Universität zu Kiel, Olshausenstr. 40, D-24098 Kiel, Germany

Email: Ulrich Lüning\* - luening@oc.uni-kiel.de

\*Corresponding author

### Product analyses and experimental data

#### Contents

25<sup>5</sup>-*tert*-Butyl-2,11,13,22-tetraoxa-23,27-diaza-1,12(1,3,2)-25(1,3)-tribenzenabicyclo[10.10.5]heptacosaphan-24,26-dione (**1**)

<sup>1</sup>H NMR S2

<sup>13</sup>C NMR S3

5-*tert*-Butyl-*N,N'*-bis(2,6-dimethoxyphenyl)-isophthalamide (**2**)

<sup>1</sup>H NMR S4

<sup>13</sup>C NMR S5

<sup>1</sup>H NMR experiments with different guests S6

Normalized CIS of **1** S9

Normalized CIS of **2** S10

Evaluation of the Normalized CIS Method S11

<sup>1</sup>H NMR titration of **1** and pyridine-*N*-oxide S17

<sup>1</sup>H, <sup>1</sup>H NOESY experiments S18

Transport experiments S20

References S23

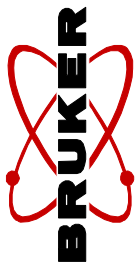

Position 44  
Mitarbeiter Fischmann  
Probe SF-09-1  
Menge 9.7 mg / CDCl<sub>3</sub>

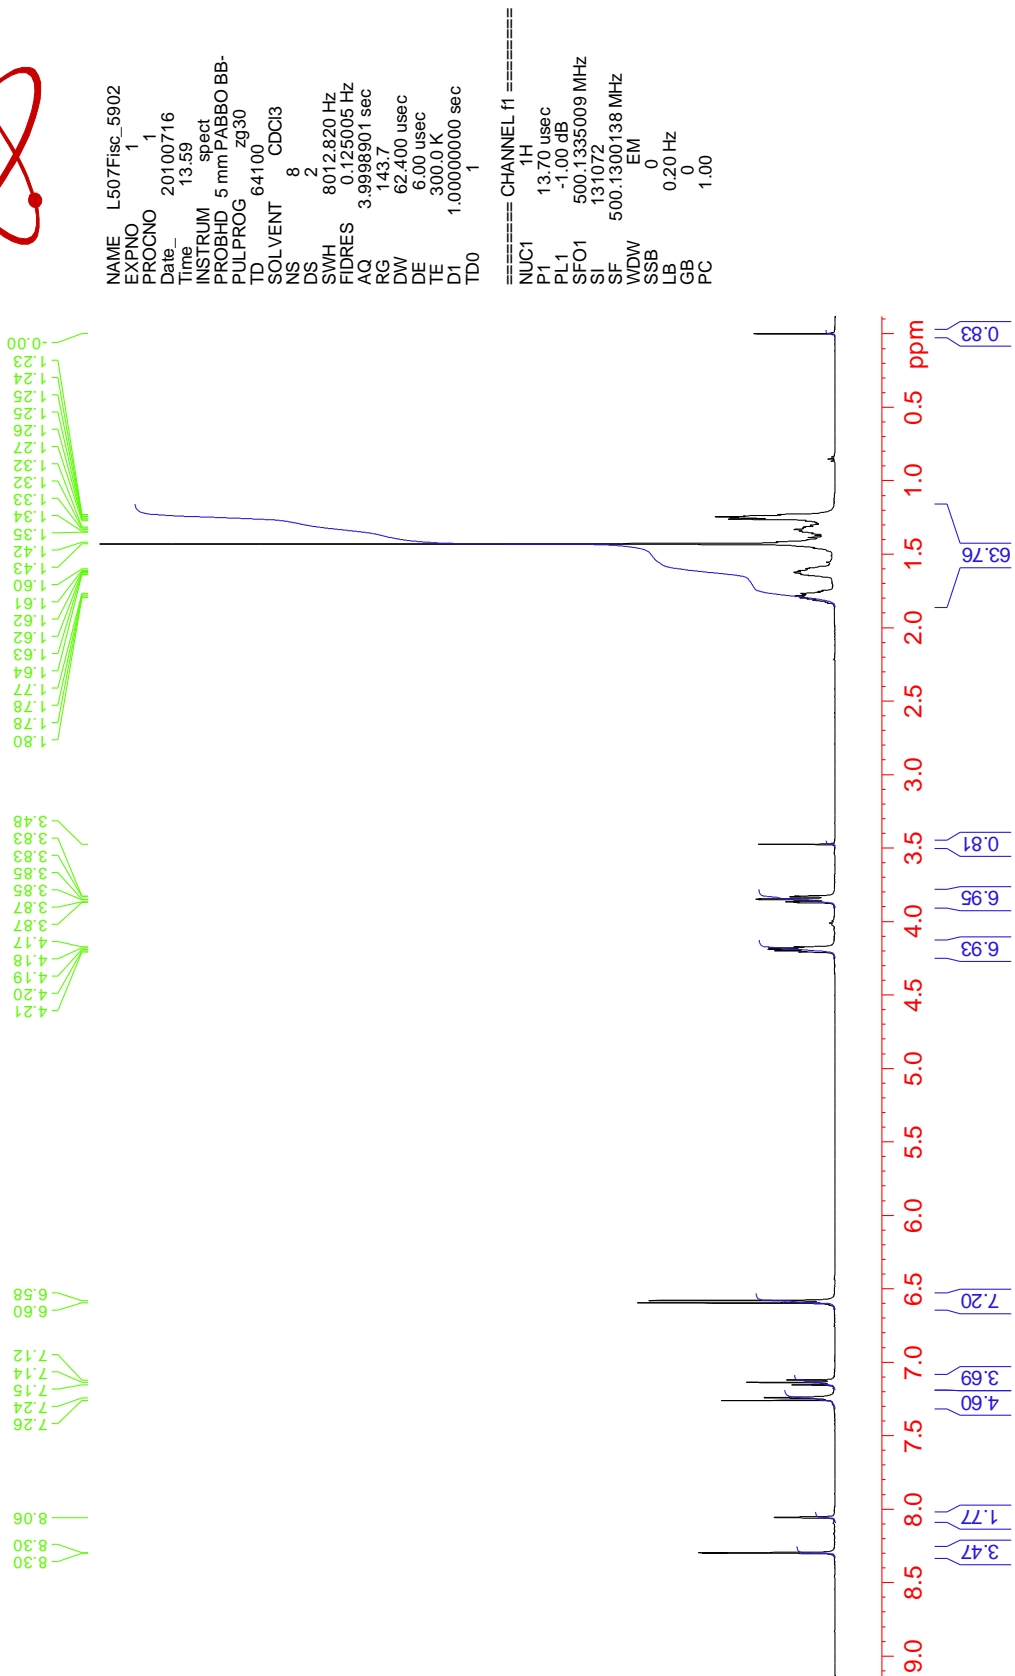

Figure S1: <sup>1</sup>H NMR (500 MHz, 300 K, CDCl<sub>3</sub>) of 1.

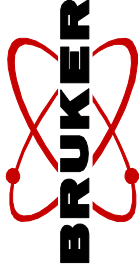

NAME L507Fisc\_5902  
EXPNO 3  
PROCNO 1  
Date\_ 20100716  
Time 16.08  
INSTRUM spect  
PROBHD 5 mm PABBO BB-  
PULPROG zgpg30  
TD 65536  
SOLVENT CDCl3  
NS 2000  
DS 4  
SWH 30303.031 Hz  
FIDRES 0.462388 Hz  
AQ 1.0813940 sec  
RG 5160.6  
DW 16.500 usec  
DE 6.00 usec  
TE 300.0 K  
D1 1.00000000 sec  
d11 0.03000000 sec  
DELTA 0.89999998 sec  
TD0 1

==== CHANNEL f1 =====  
NUC1 13C  
P1 9.90 usec  
PL1 0.00 dB  
SFO1 125.7716224 MHz

==== CHANNEL f2 =====  
CPDPRG2 waiz16  
NUC2 1H  
PCPD2 80.00 usec  
PL2 -1.00 dB  
PL12 16.00 dB  
PL13 16.00 dB  
SFO2 500.1320005 MHz  
SI 131072  
SF 125.7577890 MHz  
WDW EM  
SSB 0  
LB 2.00 Hz  
GB 0  
PC 1.40

Position 44  
Mitarbeiter Fischmann  
Probe SF-09-1  
Menge 9.7 mg / CDCl3

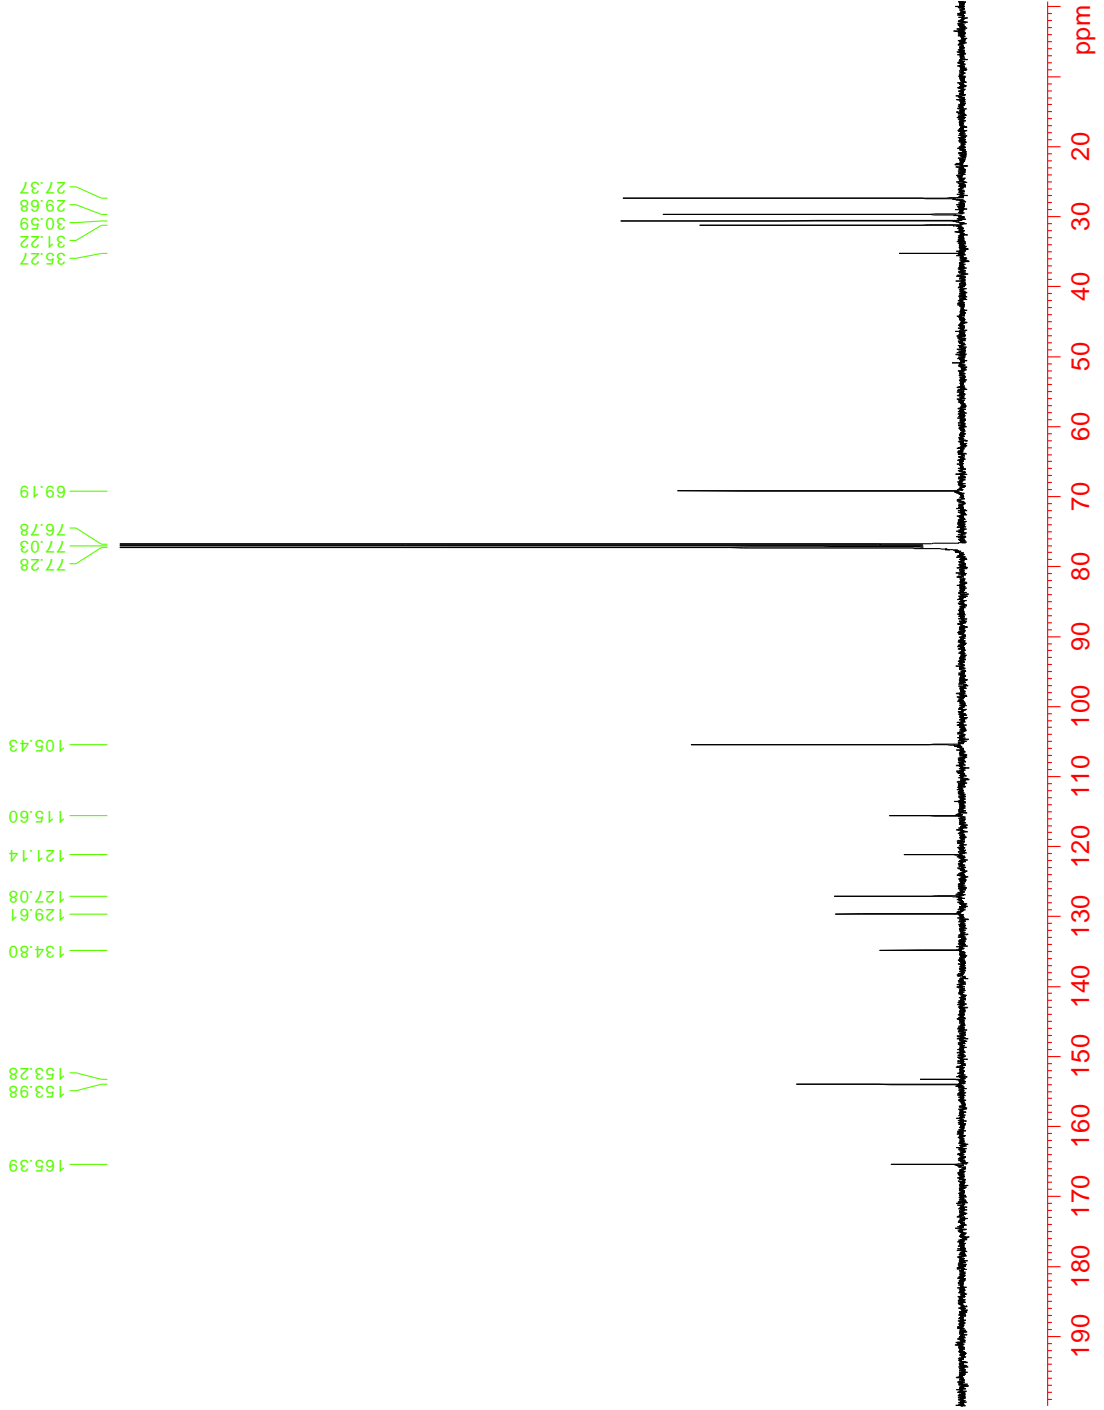

Figure S2: <sup>13</sup>C NMR (125 MHz, 300 K, CDCl<sub>3</sub>) of 1.

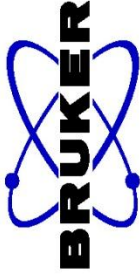

NAME L507Fisc\_5632  
EXPNO 1  
PROCNO 1  
Date\_ 20100709  
Time\_ 8.22  
INSTRUM spect  
PROBHD 5 mm PABBO BB-  
PULPROG zg30  
TD 64100  
SOLVENT CDCl3  
NS 8  
DS 2  
SWH 8012.820 Hz  
FIDRES 0.125005 Hz  
AQ 3.9998901 sec  
RG 114  
DW 62.400 usec  
DE 6.00 usec  
TE 300.0 K  
D1 1.00000000 sec  
TD0 1  
==== CHANNEL f1 =====  
NUC1 1H  
P1 13.70 usec  
PL1 -1.00 dB  
SF01 500.1335009 MHz  
SI 131072  
SF 500.1300129 MHz  
WDW EM  
SSB 0  
LB 0.20 Hz  
GB 0  
PC 1.00

Position 27  
Mitarbeiter Fischmann  
Probe SF-06a  
Menge 13.8mg/cdCl3

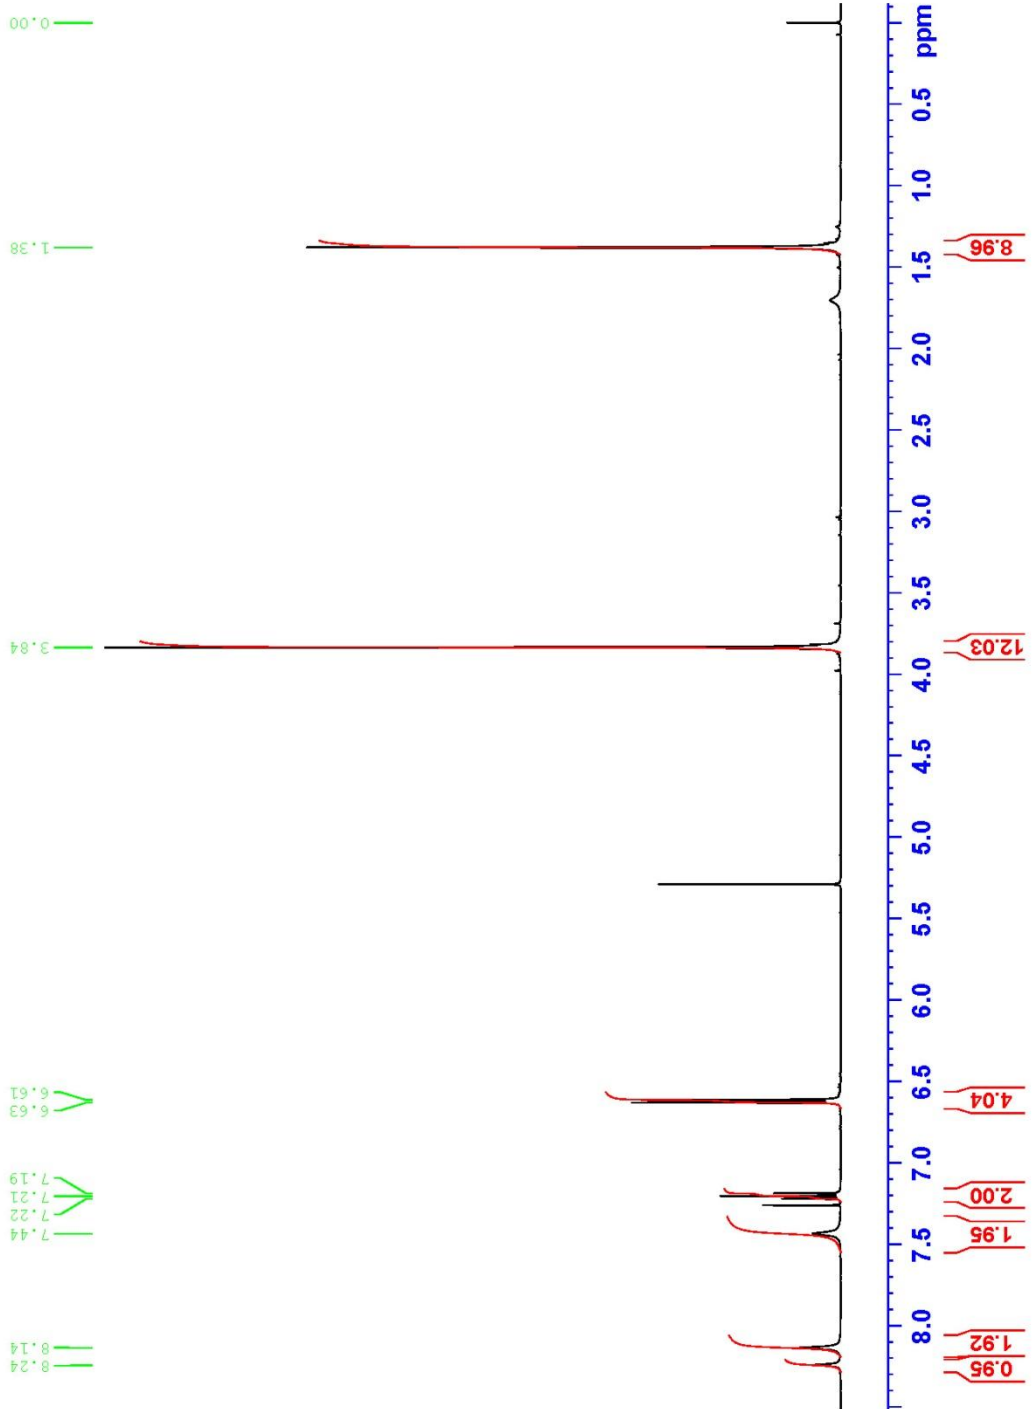

Figure S3:  $^1\text{H}$  NMR (500 MHz, 300 K,  $\text{CDCl}_3$ ) of **2**.

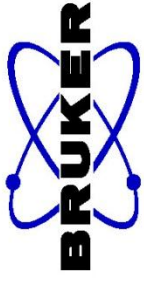

Position 27  
Mitarbeiter Fischmann  
Probe SF-06a  
Menge 13.8mg/cDC13

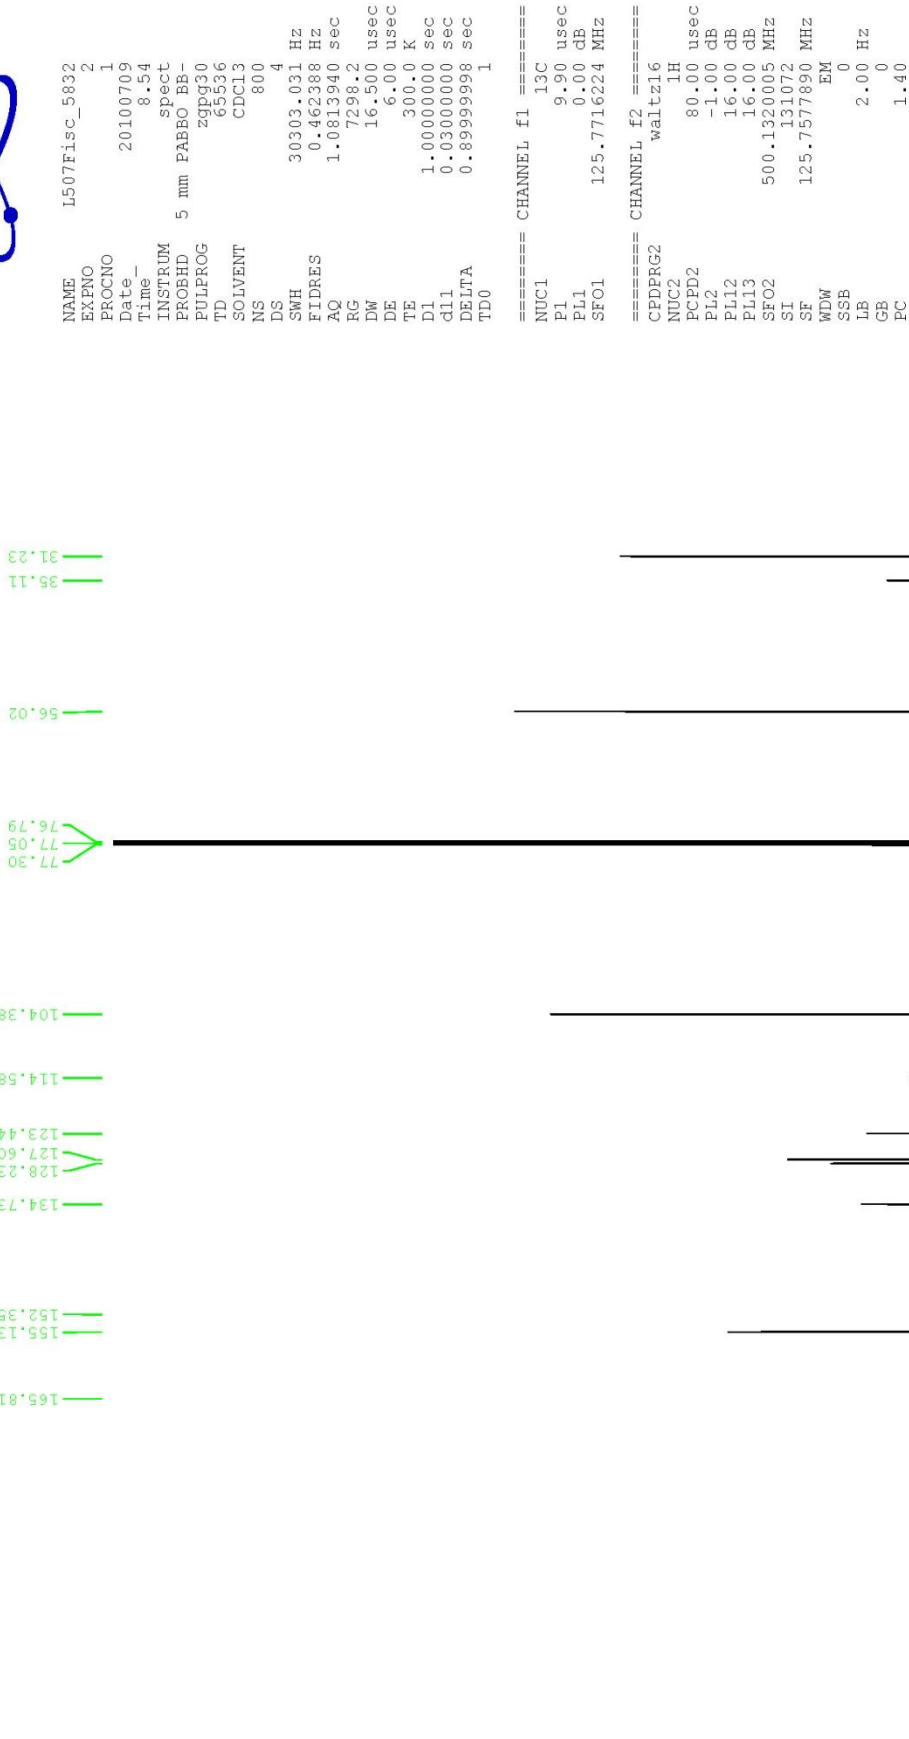

Figure S4:  $^{13}\text{C}$  NMR (125 MHz, 300 K,  $\text{CDCl}_3$ ) of **2**.

## NMR-Experiments

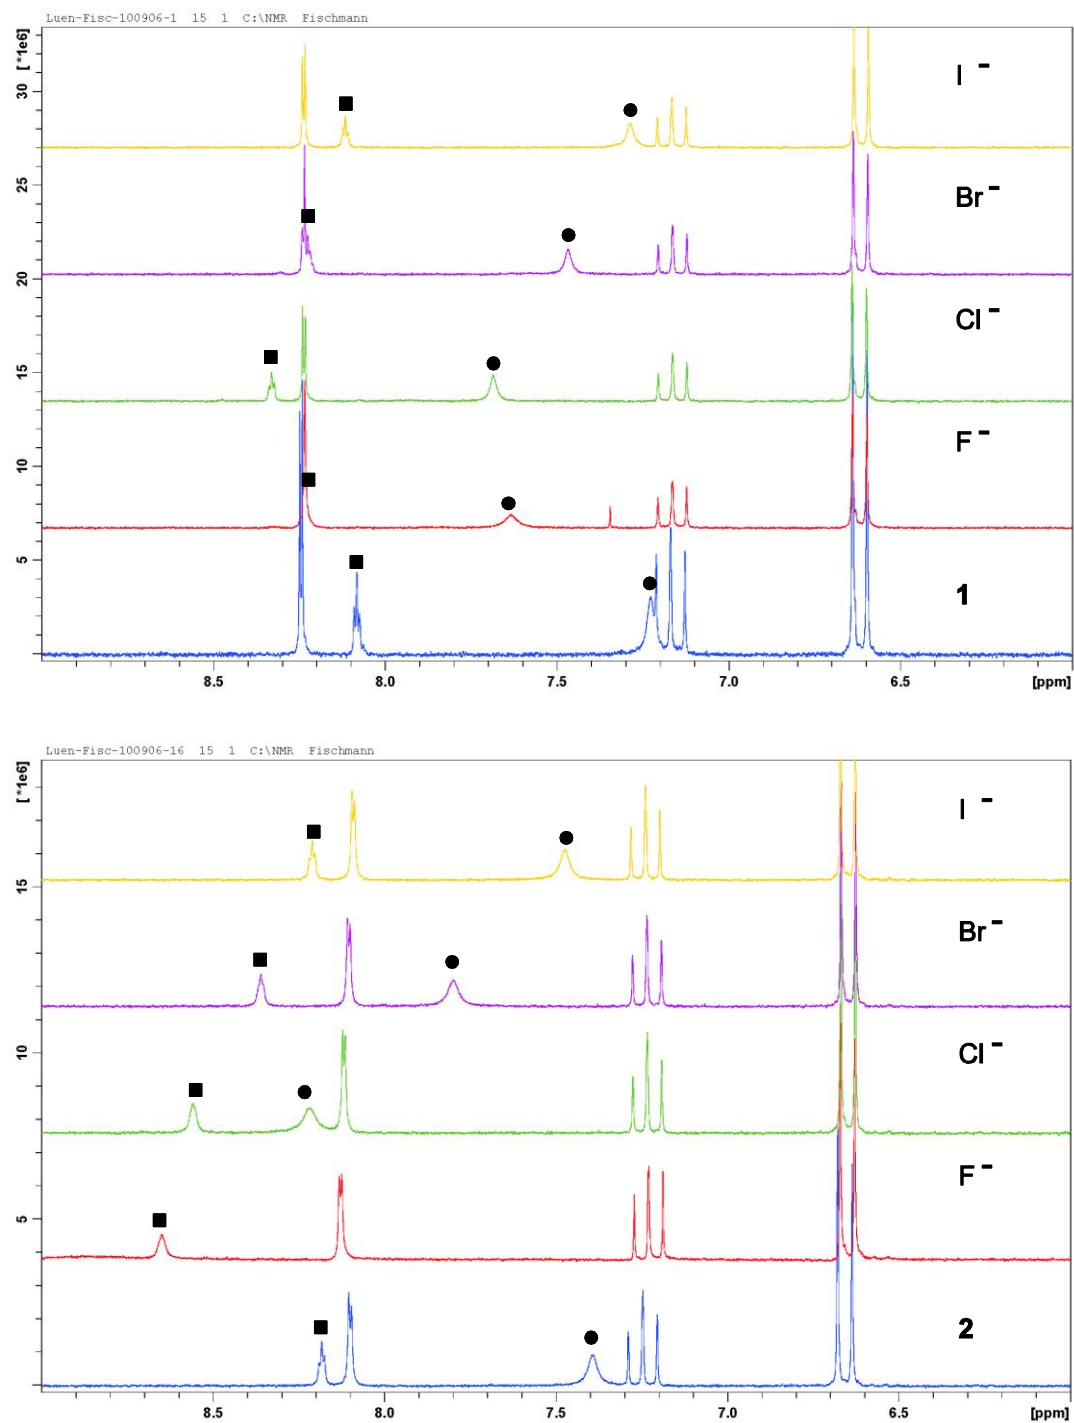

**Figure S5:** Binding studies with different tetrabutylammonium halides (5 equivalents; top: bi-macrocycle **1**, bottom: isophthalamide **2**). The guests were added in solid form and the exact amount was calculated from the  $^1\text{H}$  NMR integration.

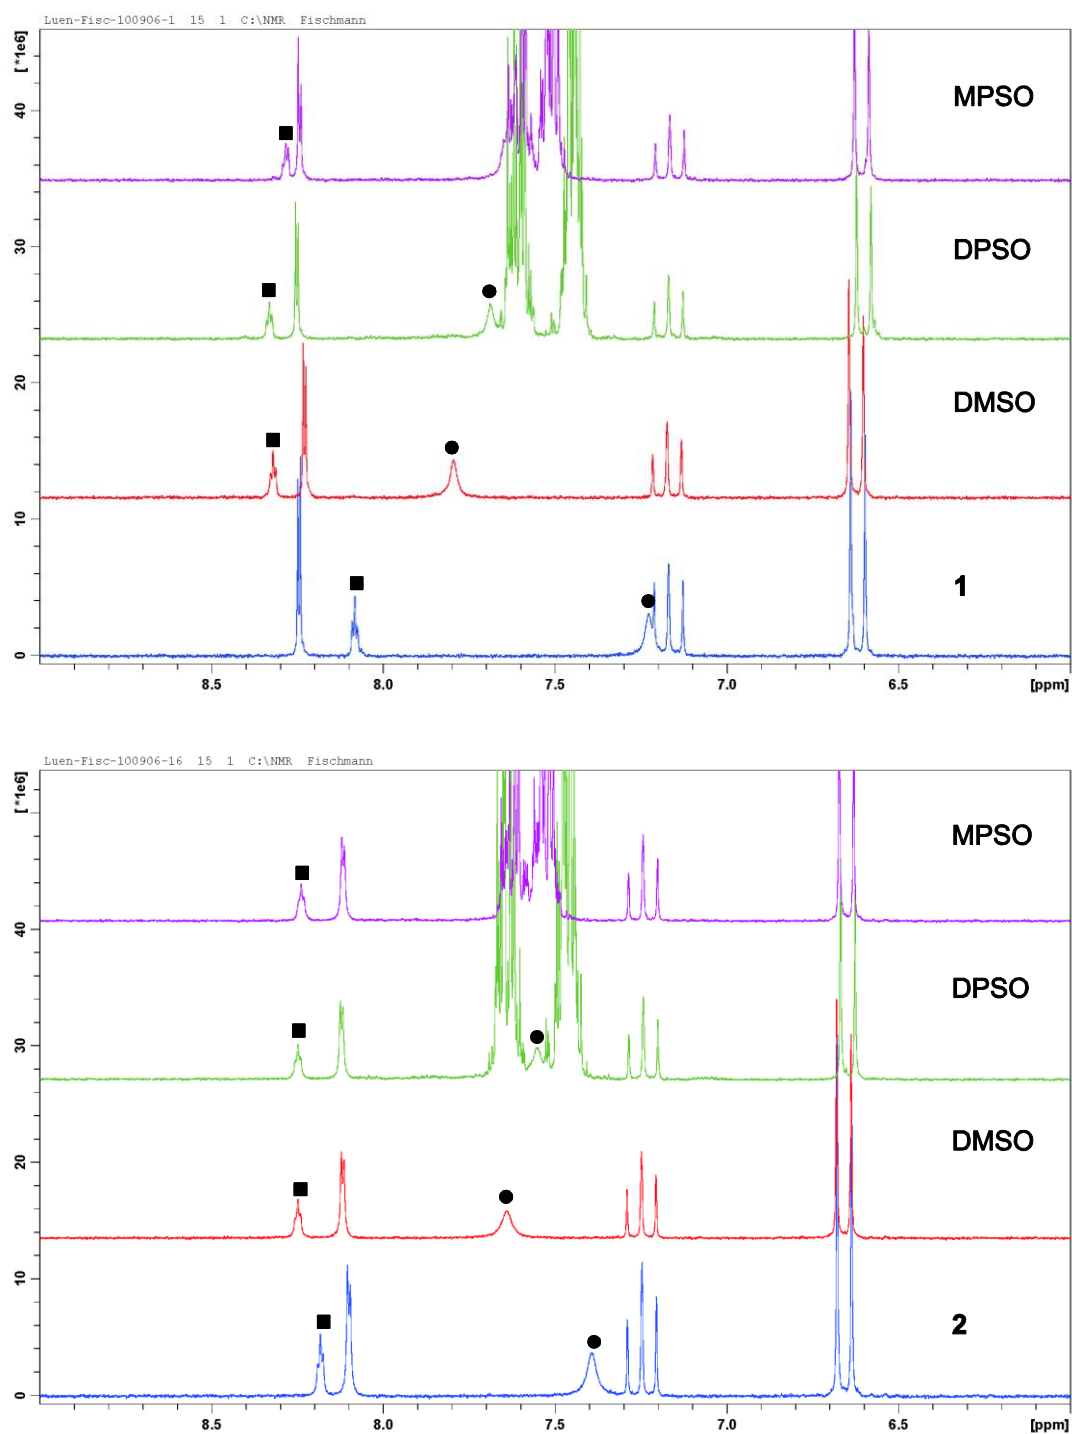

**Figure S6:** Binding studies with different sulfoxides (5 equivalents; top: bi-macrocycle **1**, bottom: isophthalamide **2**, MPSO = methylphenyl sulfoxide, DPSO = diphenyl sulfoxide, DMSO = dimethyl sulfoxide). The guests were added undiluted and the exact amount was calculated from the <sup>1</sup>H NMR integration.

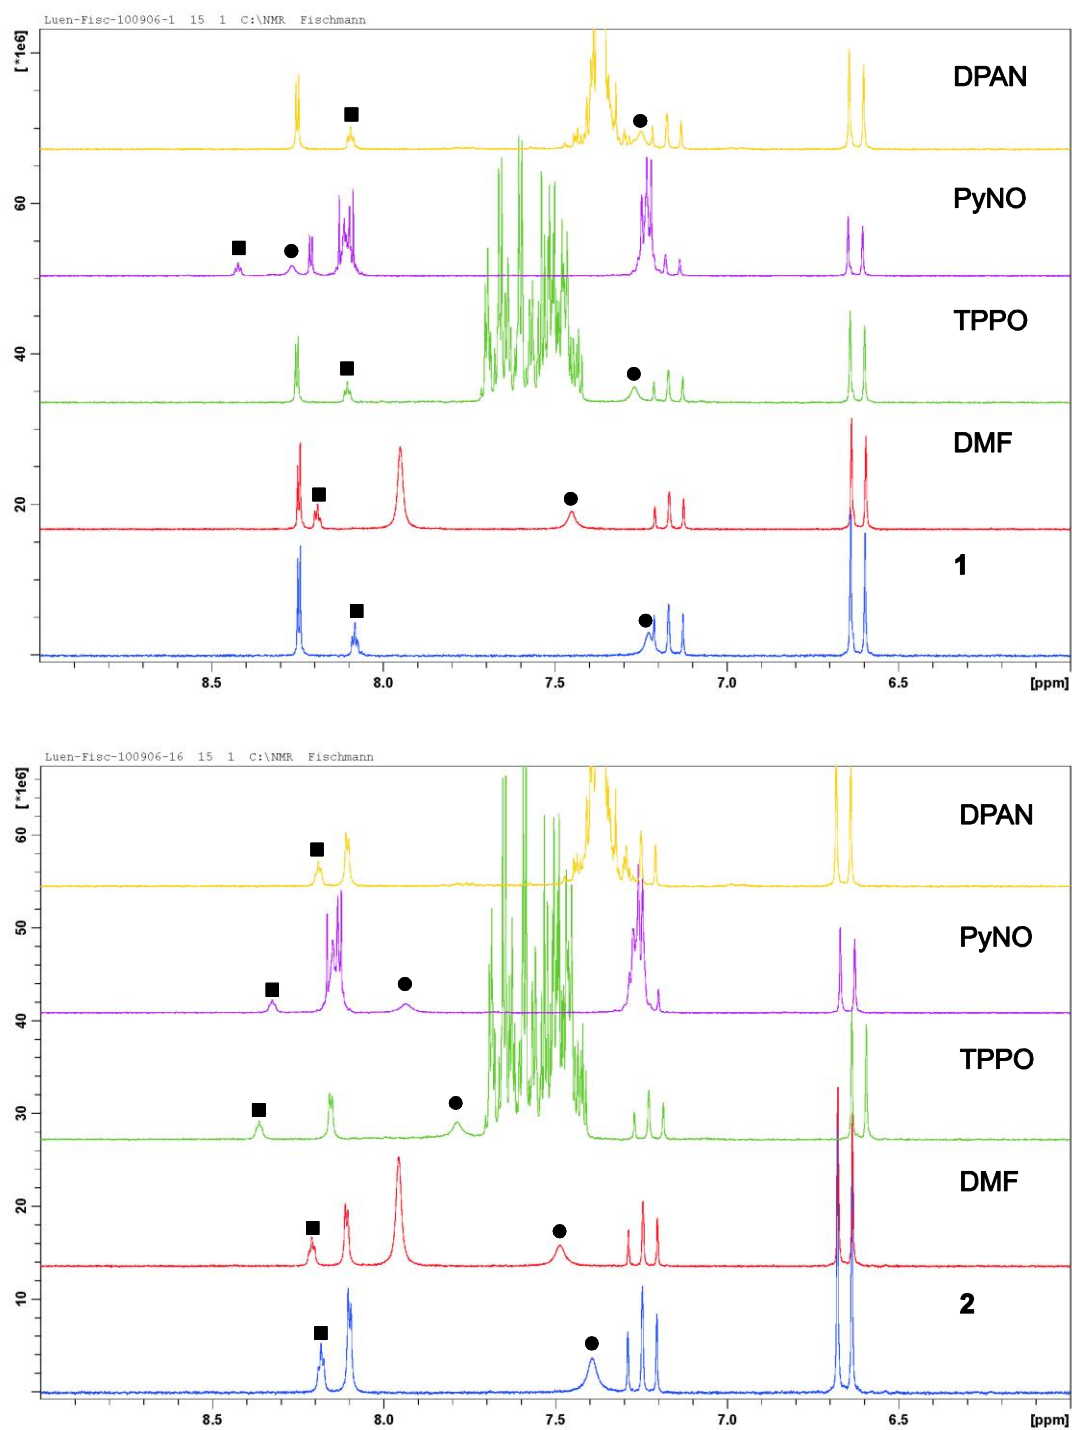

**Figure S7:** Binding studies with different guests (5 equivalents; top: bi-macrocycle **1**, bottom: isophthalamide **2**, DPAN = diphenylacetonitrile, PyNO = pyridine-*N*-oxide, TPPO = triphenylphosphine oxide, DMF = *N,N*-dimethylformamide). The guests were added undiluted and the exact amount was calculated from the  $^1\text{H}$  NMR integration.



## Normalized CIS of 1

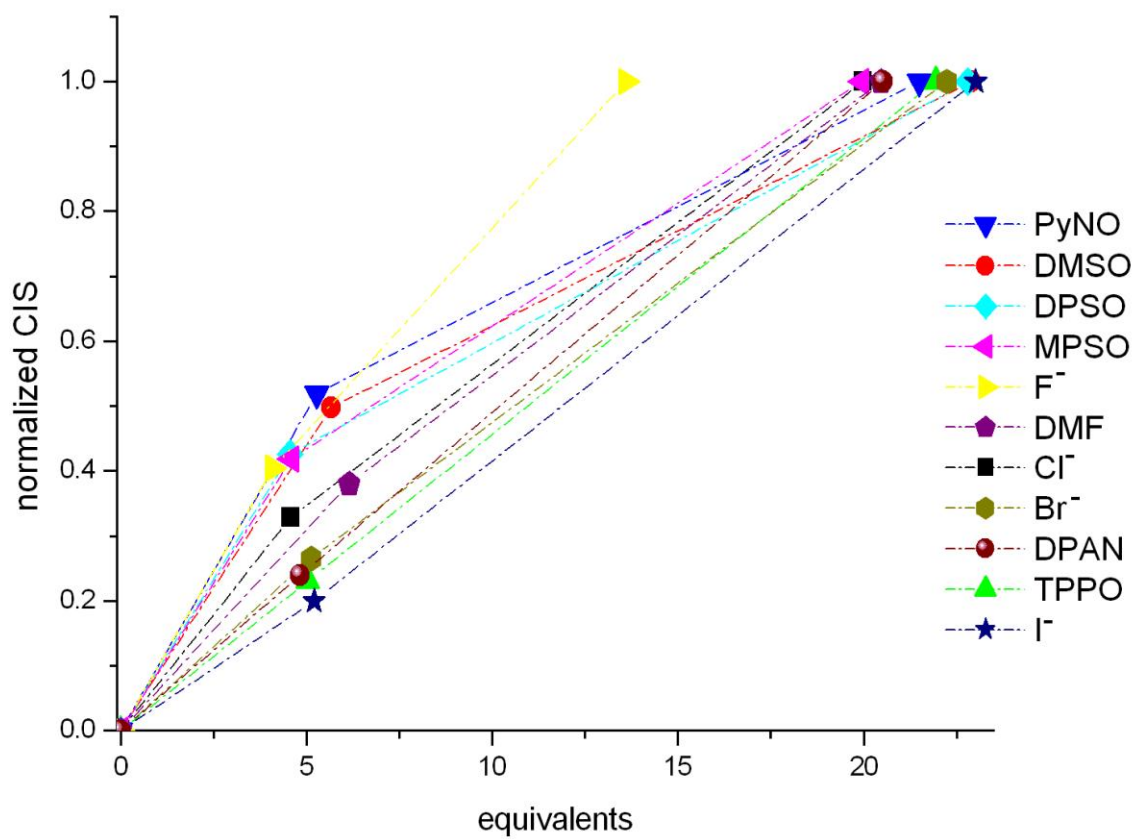

**Figure S8:** Normalized CIS of **1** (isophthalamide *endo*-CH proton).

## Normalized CIS of 2

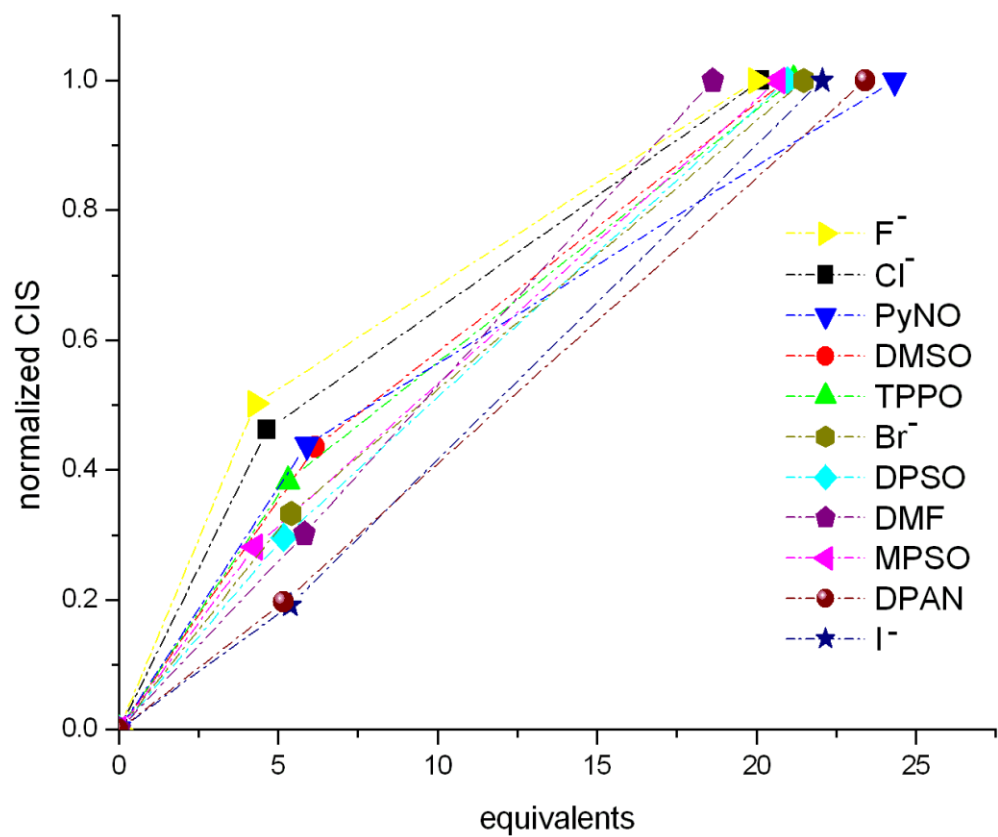

**Figure S9:** Normalized CIS of **2** (isophthalamide *endo* CH proton).

## Evaluation of the Normalized CIS Method

To prove that normalized CIS is a valid method to estimate the binding strength, six different titration curves were simulated. Association constants between  $K_{\text{ass}} = 2$  and  $K_{\text{ass}} = 100$  were chosen. Host concentration was fixed at  $0.003 \text{ mol L}^{-1}$ .

Equations used:

$$H := 0.003$$

$$G := 0,0.0001 \dots 0.06$$

$$\Delta\delta_{\text{max}} := 1$$

$$K := 2$$

$$K_2(G) := \left[ \frac{\Delta\delta_{\text{max}}}{(2 \cdot H)} \cdot \left[ G + H + \left( \frac{1}{K} \right) - \left[ (G - H)^2 + \left( 2 \cdot \frac{G}{K} \right) + \left( 2 \cdot \frac{H}{K} \right) + \left[ \frac{1}{(K)^2} \right]^{0.5} \right] \right]$$

$$K := 5$$

$$K_5(G) := \left[ \frac{\Delta\delta_{\text{max}}}{(2 \cdot H)} \cdot \left[ G + H + \left( \frac{1}{K} \right) - \left[ (G - H)^2 + \left( 2 \cdot \frac{G}{K} \right) + \left( 2 \cdot \frac{H}{K} \right) + \left[ \frac{1}{(K)^2} \right]^{0.5} \right] \right]$$

$$K := 10$$

$$K_{10}(G) := \left[ \frac{\Delta\delta_{\text{max}}}{(2 \cdot H)} \cdot \left[ G + H + \left( \frac{1}{K} \right) - \left[ (G - H)^2 + \left( 2 \cdot \frac{G}{K} \right) + \left( 2 \cdot \frac{H}{K} \right) + \left[ \frac{1}{(K)^2} \right]^{0.5} \right] \right]$$

$$K := 20$$

$$K_{20}(G) := \left[ \frac{\Delta\delta_{\text{max}}}{(2 \cdot H)} \cdot \left[ G + H + \left( \frac{1}{K} \right) - \left[ (G - H)^2 + \left( 2 \cdot \frac{G}{K} \right) + \left( 2 \cdot \frac{H}{K} \right) + \left[ \frac{1}{(K)^2} \right]^{0.5} \right] \right]$$

$$K := 50$$

$$K_{50}(G) := \left[ \frac{\Delta\delta_{\text{max}}}{(2 \cdot H)} \cdot \left[ G + H + \left( \frac{1}{K} \right) - \left[ (G - H)^2 + \left( 2 \cdot \frac{G}{K} \right) + \left( 2 \cdot \frac{H}{K} \right) + \left[ \frac{1}{(K)^2} \right]^{0.5} \right] \right]$$

$$K := 100$$

$$K_{100}(G) := \left[ \frac{\Delta\delta_{\text{max}}}{(2 \cdot H)} \cdot \left[ G + H + \left( \frac{1}{K} \right) - \left[ (G - H)^2 + \left( 2 \cdot \frac{G}{K} \right) + \left( 2 \cdot \frac{H}{K} \right) + \left[ \frac{1}{(K)^2} \right]^{0.5} \right] \right]$$

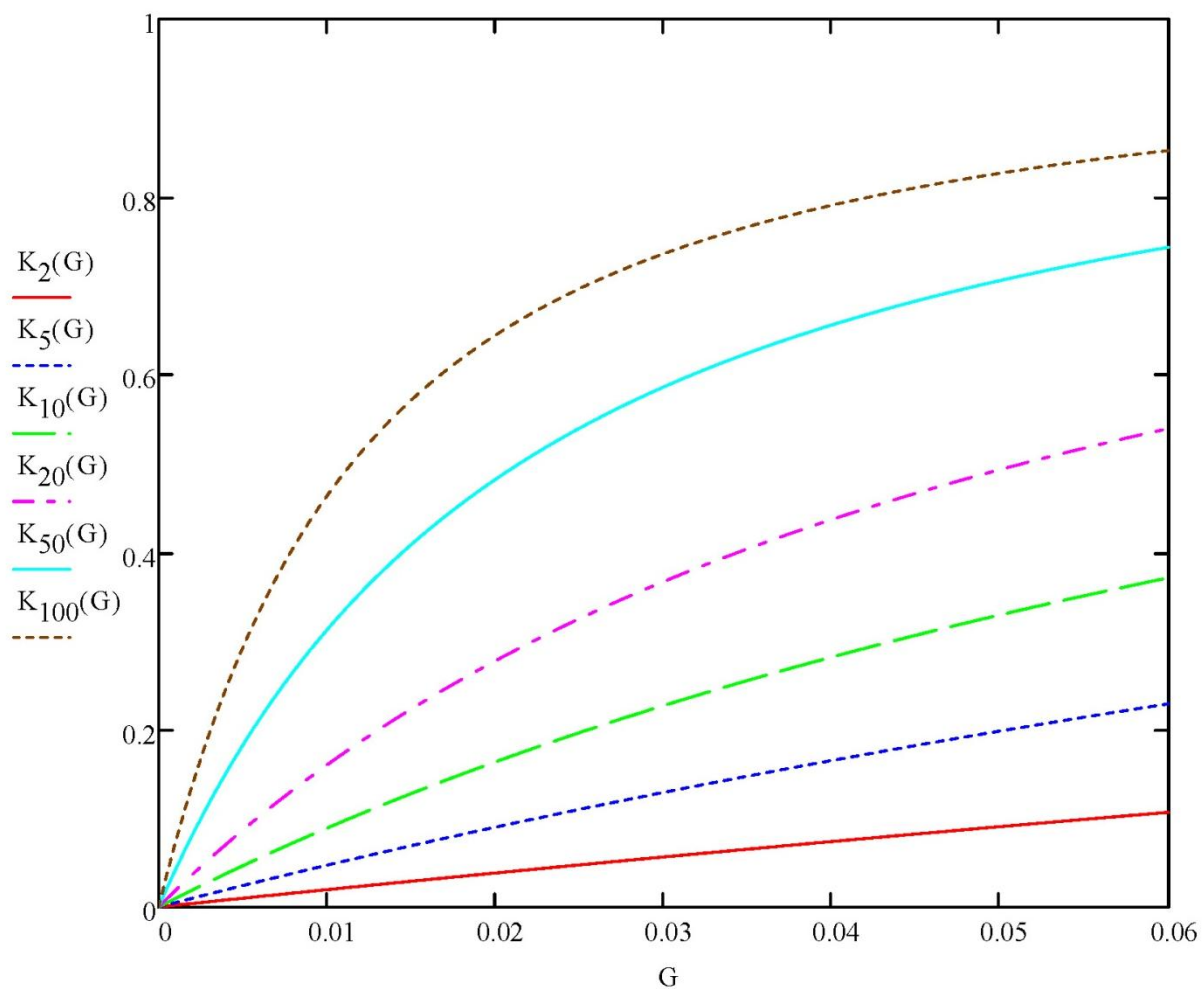

**Figure S10:** Calculated titration curves for  $K_{\text{ass}} = 2$  up to  $K_{\text{ass}} = 100$ . The change in CIS ( $\Delta\delta$ , in ppm) is plotted against the concentration of the guest ( $G$ , in  $\text{M}^{-1}$ ).

In the normalizing procedure, the CIS at 5 eq. was divided by the CIS at 20 eq. and the CIS at 20 eq. was divided by itself.

$$\text{eq} := \begin{pmatrix} 0 \\ 5 \\ 20 \end{pmatrix}$$

$$K_{2n} := \begin{bmatrix} 0 \\ \left( \frac{K_2(5 \cdot H)}{K_2(20 \cdot H)} \right) \\ 1 \end{bmatrix} \quad K_{5n} := \begin{bmatrix} 0 \\ \left( \frac{K_5(5 \cdot H)}{K_5(20 \cdot H)} \right) \\ 1 \end{bmatrix} \quad K_{10n} := \begin{bmatrix} 0 \\ \left( \frac{K_{10}(5 \cdot H)}{K_{10}(20 \cdot H)} \right) \\ 1 \end{bmatrix}$$

$$K_{20n} := \begin{bmatrix} 0 \\ \left( \frac{K_{20}(5 \cdot H)}{K_{20}(20 \cdot H)} \right) \\ 1 \end{bmatrix} \quad K_{50n} := \begin{bmatrix} 0 \\ \left( \frac{K_{50}(5 \cdot H)}{K_{50}(20 \cdot H)} \right) \\ 1 \end{bmatrix} \quad K_{100n} := \begin{bmatrix} 0 \\ \left( \frac{K_{100}(5 \cdot H)}{K_{100}(20 \cdot H)} \right) \\ 1 \end{bmatrix}$$

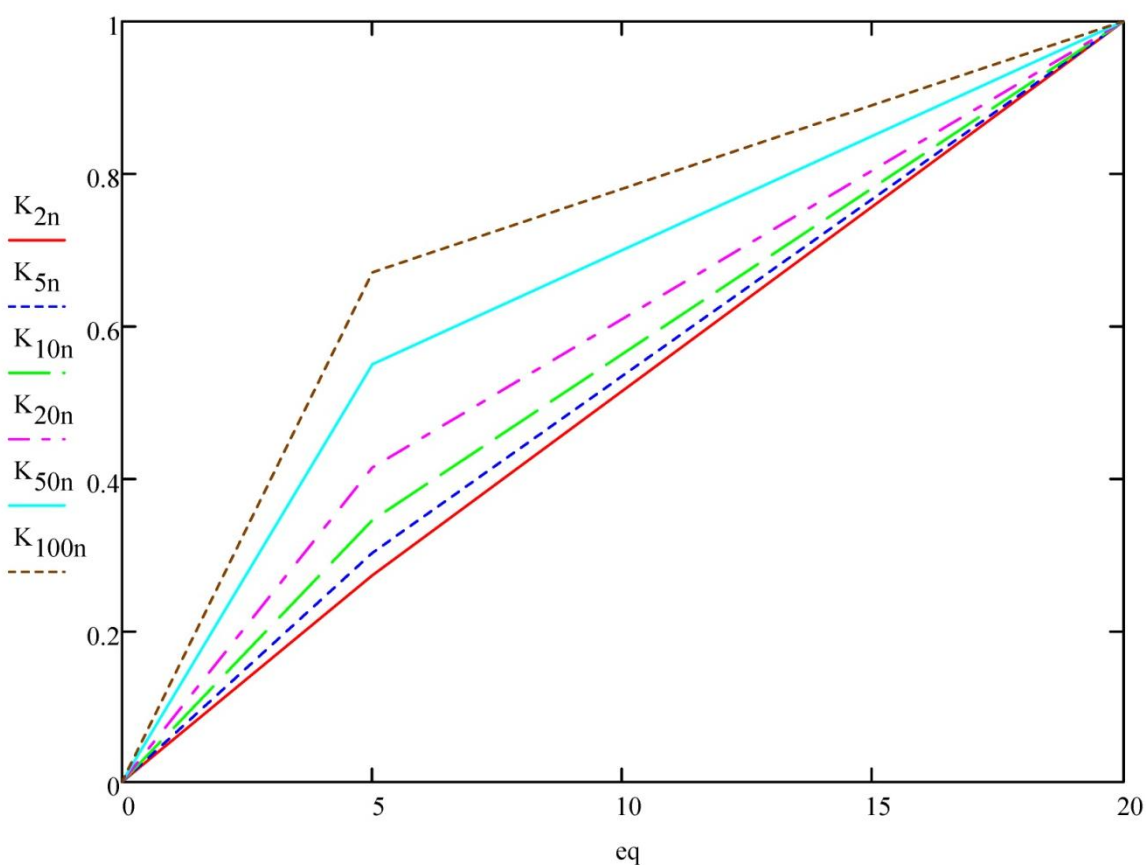

**Figure S11:** The resulting graph shows the simple correlation between the association constant and the deviation from the diagonal (0,0 → 20,1). The normalized change in CIS ( $\Delta\delta_n$ , in ppm) is plotted against the number of equivalents of the guest.

In a second test, different titration curves with different  $\Delta\delta_{\max}$  (0.3, 1, 3 ppm) were simulated at a constant  $K_{\text{ass}} = 20$ .

$$K := 20$$

$$H := 0.003 \quad G := 0, 0.0001 \dots 0.06$$

$K$  = association constant ( $\text{M}^{-1}$ )

$G$  = concentration guest ( $\text{M}^{-1}$ )

$H$  = concentration host ( $\text{M}^{-1}$ )

$\Delta\delta_{\max} = \text{shift}(G_{\text{sat}}) - \text{shift}(G_0)$  (ppm)

$$\Delta\delta_{\max} := 0.3$$

$$\Delta\delta_{0.3}(G) := \left[ \left[ \frac{\Delta\delta_{\max}}{(2 \cdot H)} \right] \cdot \left[ G + H + \left( \frac{1}{K} \right) \right] - \left[ (G - H)^2 \right] + \left( 2 \cdot \frac{G}{K} \right) + \left( 2 \cdot \frac{H}{K} \right) + \left[ \frac{1}{(K)^2} \right] \right]^{0.5} \right]$$

$$\Delta\delta_{\max} := 1$$

$$\Delta\delta_1(G) := \left[ \left[ \frac{\Delta\delta_{\max}}{(2 \cdot H)} \right] \cdot \left[ G + H + \left( \frac{1}{K} \right) \right] - \left[ (G - H)^2 \right] + \left( 2 \cdot \frac{G}{K} \right) + \left( 2 \cdot \frac{H}{K} \right) + \left[ \frac{1}{(K)^2} \right] \right]^{0.5} \right]$$

$$\Delta\delta_{\max} := 3$$

$$\Delta\delta_3(G) := \left[ \left[ \frac{\Delta\delta_{\max}}{(2 \cdot H)} \right] \cdot \left[ G + H + \left( \frac{1}{K} \right) \right] - \left[ (G - H)^2 \right] + \left( 2 \cdot \frac{G}{K} \right) + \left( 2 \cdot \frac{H}{K} \right) + \left[ \frac{1}{(K)^2} \right] \right]^{0.5} \right]$$

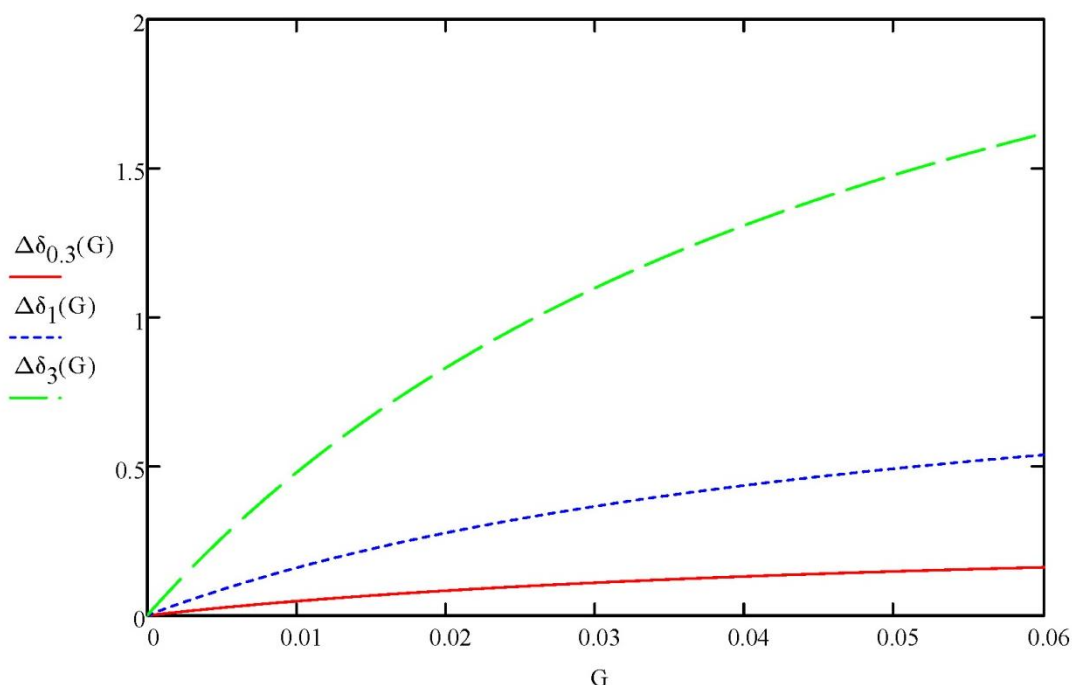

**Figure S12:** Calculated titration curves for different  $\Delta\delta_{\max}$  (0.3, 1, 3 ppm) at a constant association constant of  $20 \text{ M}^{-1}$ . The change in CIS ( $\Delta\delta$ , in ppm) is plotted against the concentration of the guest ( $G$ , in  $\text{mol L}^{-1}$ ).

In the normalized procedure, the CIS at 5 eq. was divided by the CIS at 20 eq. and the CIS at 20 eq. was divided by itself.

$$q := \begin{pmatrix} 0 \\ 5 \\ 20 \end{pmatrix} \quad \Delta\delta_{0.3n} := \begin{bmatrix} 0 \\ \left( \frac{\Delta\delta_{0.3}(5 \cdot H)}{\Delta\delta_{0.3}(20 \cdot H)} \right) \\ 1 \end{bmatrix} \quad \Delta\delta_{1n} := \begin{bmatrix} 0 \\ \left( \frac{\Delta\delta_1(5 \cdot H)}{\Delta\delta_1(20 \cdot H)} \right) \\ 1 \end{bmatrix} \quad \Delta\delta_{3n} := \begin{bmatrix} 0 \\ \left( \frac{\Delta\delta_3(5 \cdot H)}{\Delta\delta_3(20 \cdot H)} \right) \\ 1 \end{bmatrix}$$

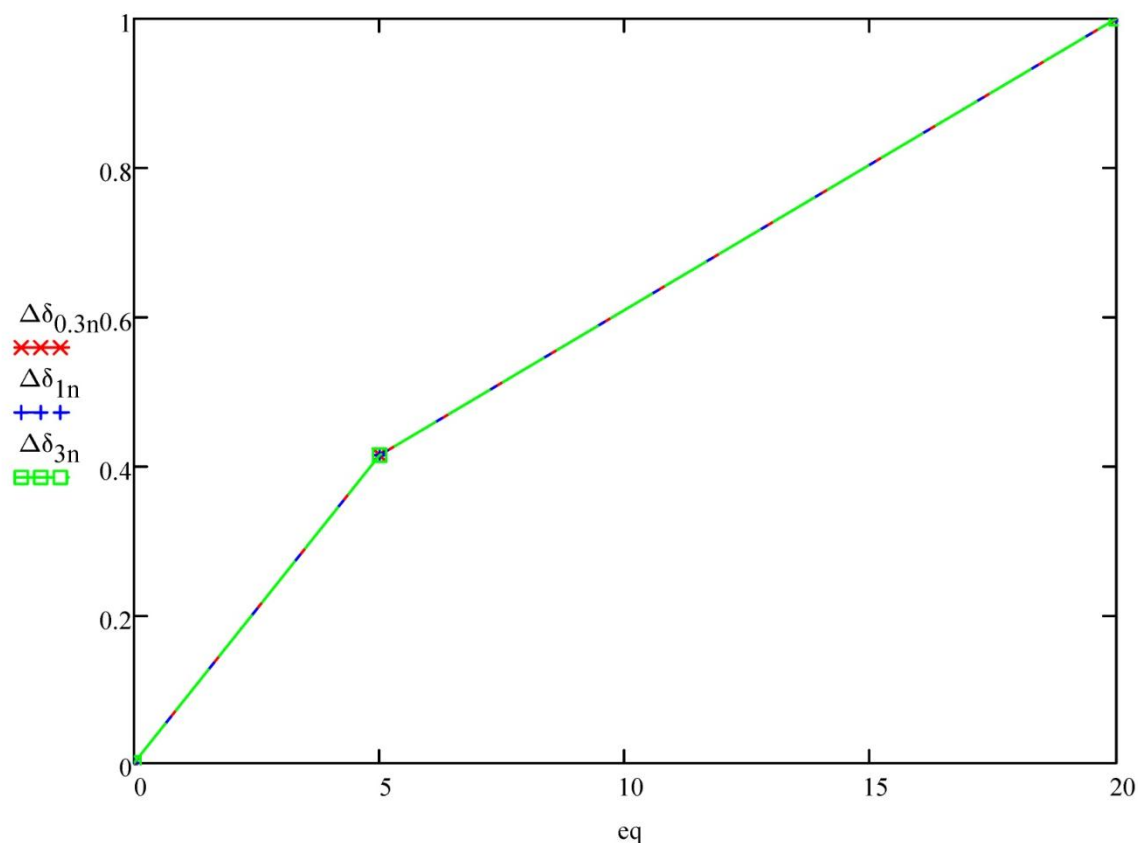

**Figure S13:** The resulting graph shows that the normalizing CIS method is not influenced by the maximum CIS of a titration experiment ( $\Delta\delta_{\max}$ ).

In an additional test, all six different association constants were permuted with these three different  $\Delta\delta_{\max}$  with results analogous to those already presented.

A cross-check of the normalized CIS method was carried out for a  $^1\text{H}$  NMR titration with a small binding constant of  $K_{\text{ass}} = 37 \text{ M}^{-1}$ , published in the literature [1,2].

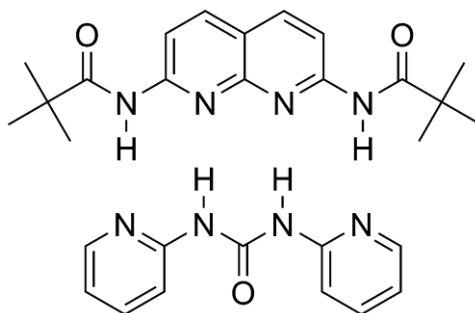

By the normalizing CIS method employing only two points, an approximate association constant of  $K_{\text{ass}} = \text{ca. } 40 \text{ M}^{-1}$  was determined.

All calculations were carried out by using Mathcad<sup>®</sup> 15.0 (Parametric Technology Corporation).



## <sup>1</sup>H NMR titration of **1** with pyridine-*N*-oxide

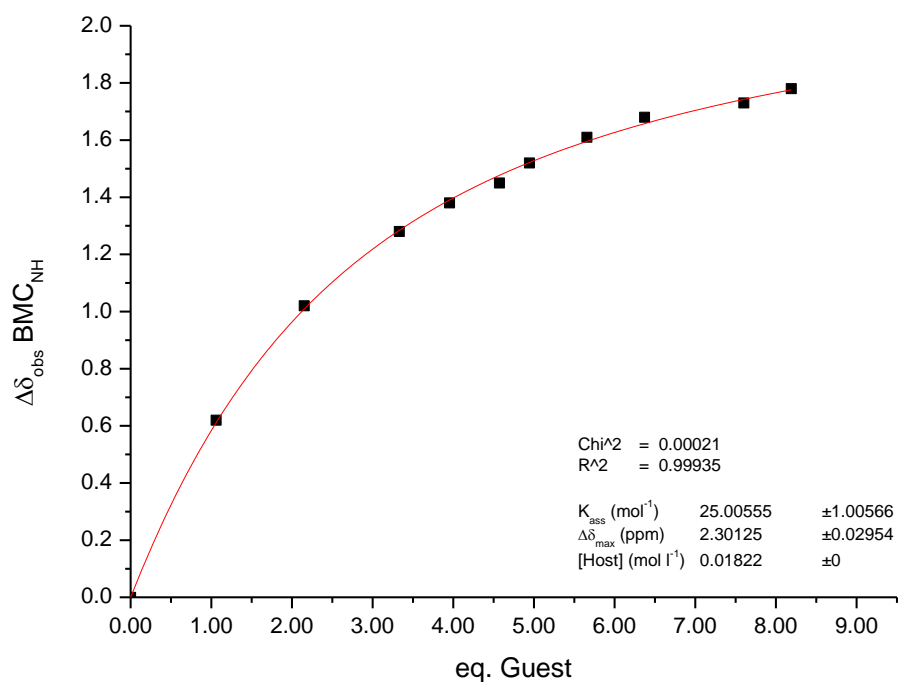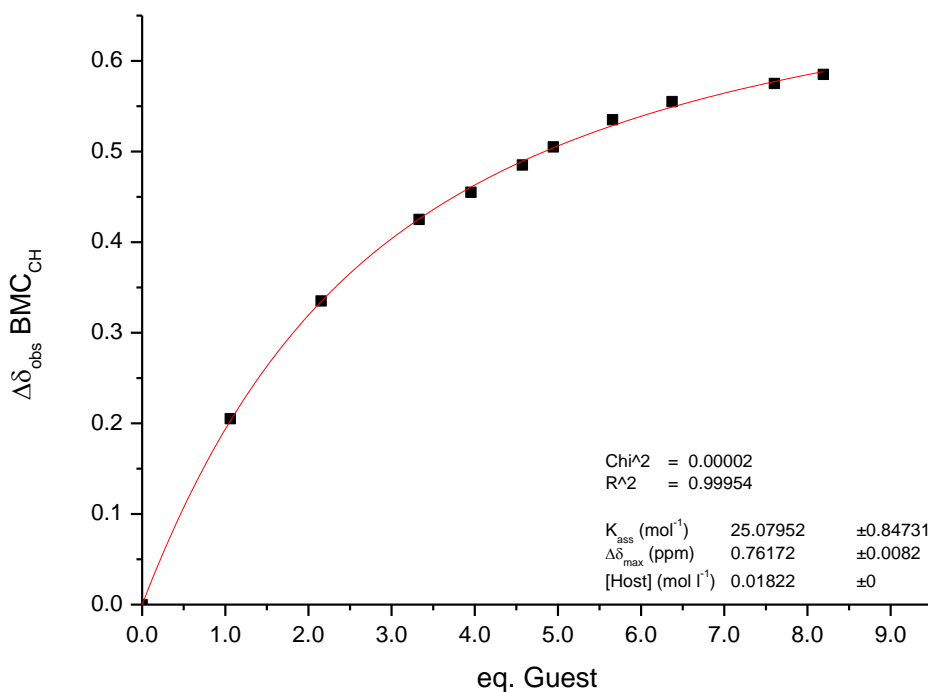

**Figure S14:** NMR titration of **1** and pyridine-*N*-oxide (500 MHz, 298 K, CD<sub>2</sub>Cl<sub>2</sub>). To a solution of **1** (7.72 mg in 600 μL CD<sub>2</sub>Cl<sub>2</sub>) was added pyridine-*N*-oxide (in CD<sub>2</sub>Cl<sub>2</sub>) in ten steps. Two signals were observed: amide NH (top) and the *endo*-CH (bottom), both resulting in  $K_{\text{ass}} = 25 \text{ mol}^{-1} \text{ L}$ .

# $^1\text{H}, ^1\text{H}$ NOESY experiments

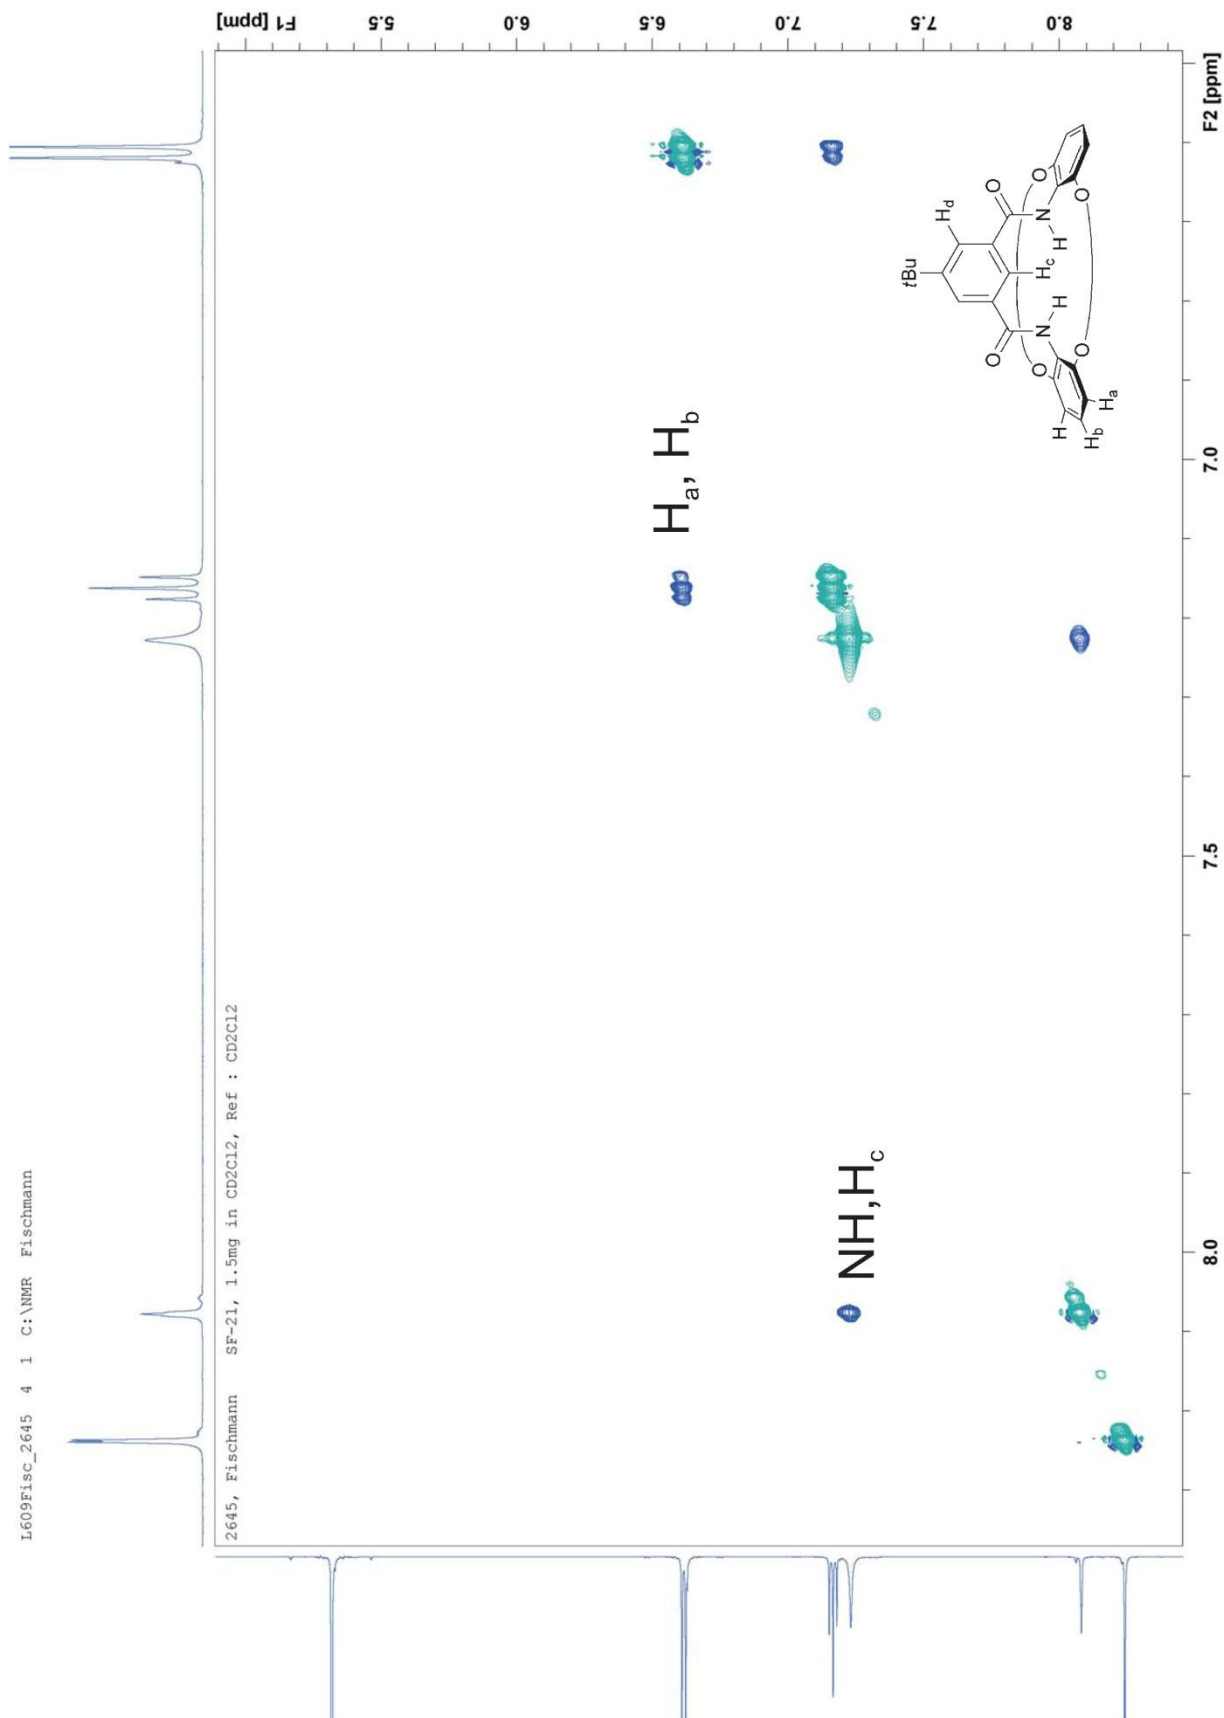

**Figure S15:** Bi-macrocycle 1. NOESY experiment, selected signals (600 MHz, 298 K,  $\text{CD}_2\text{Cl}_2$ ).

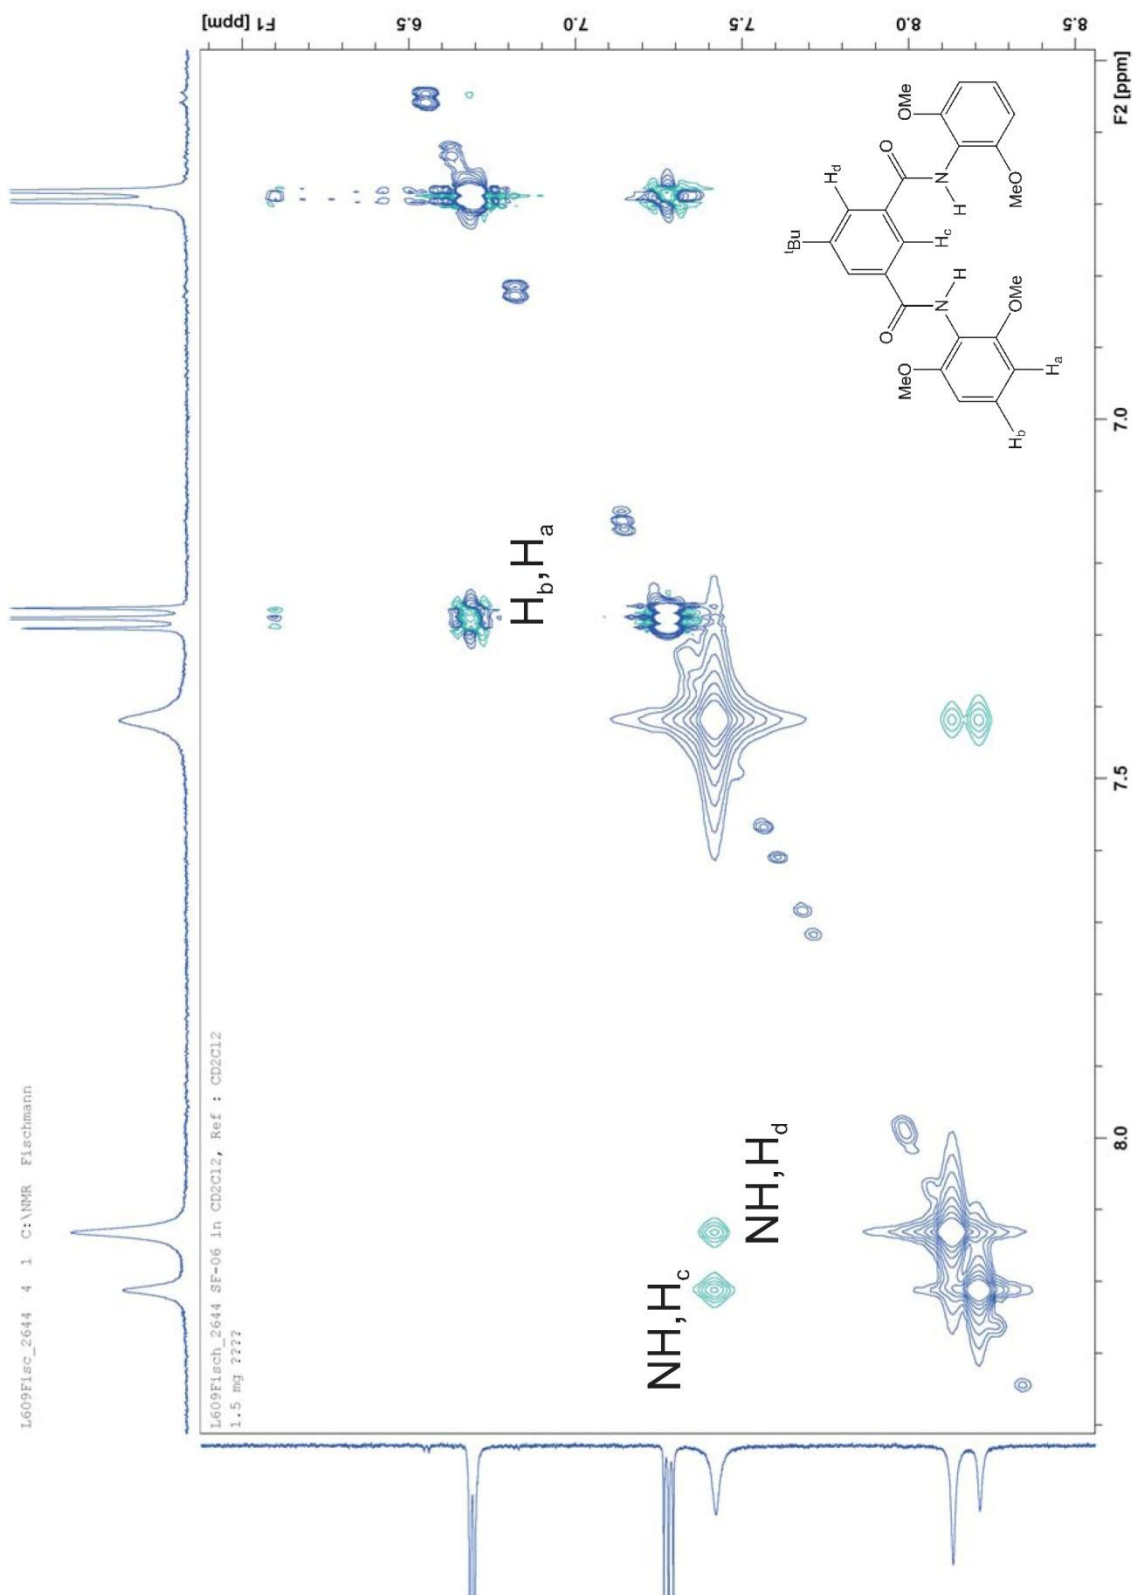

**Figure S16:** Isophthalamide **2**. NOESY experiment, selected signals (600 MHz, 298 K, CD<sub>2</sub>Cl<sub>2</sub>).

## Transport experiments

Preparation of phospholipid vesicles: The solvent of a solution of 1-palmitoyl-2-oleoyl-*sn*-glycero-3-phosphocholine (POPC, Genzyme) in chloroform (20 mg/mL) was evaporated to leave a lipid film. This was then dried under vacuum for 12 h. The lipid film was rehydrated with a solution of sodium chloride (476 mM of NaCl, 10 mM of phosphate buffer, pH = 7.2) and shaken by vortex. The suspension was then subjected to nine freeze–thaw cycles and 29 extrusions through a 200 nm polycarbonate Nucleopore membrane by using a LiposoFast Basic extruder (Avestin) to obtain unilamellar vesicles with a mean diameter of 200 nm. Finally, the suspension was dialysed against a NaNO<sub>3</sub> solution (476 mM NaNO<sub>3</sub> and 10 mM phosphate buffer, pH = 7.2) to remove unencapsulated NaCl.

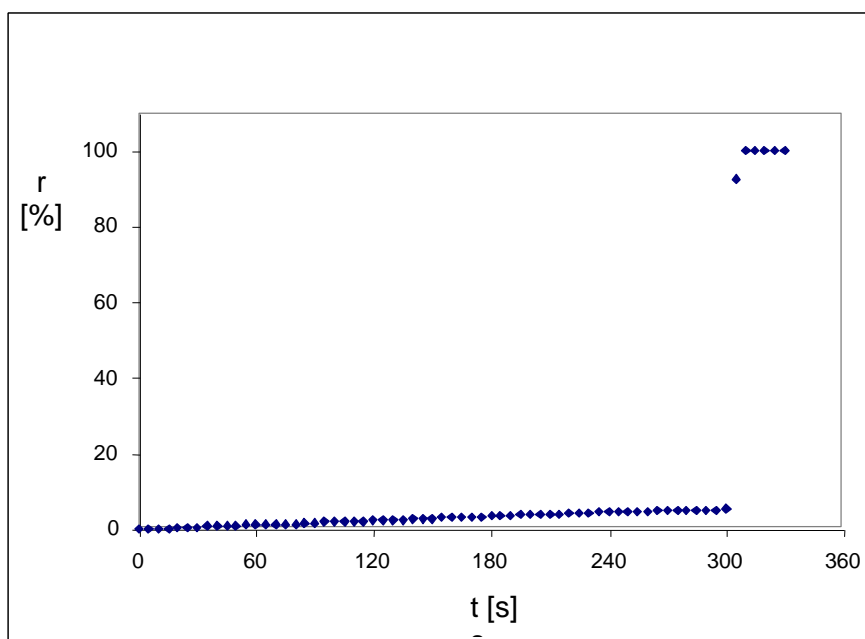

**Figure S17:** Chloride efflux upon addition of **2** (50  $\mu$ M, 10 mol % carrier to lipid) to vesicles composed of 1-palmitoyl-2-oleoyl-*sn*-glycero-3-phosphocholine (POPC). The vesicles contained NaCl (476 mM NaCl and 10 mM phosphate buffer, pH 7.2) and were immersed in NaNO<sub>3</sub> (476 mM NaNO<sub>3</sub> and 10 mM phosphate buffer, pH 7.2). Once the electrode reading was stable the carrier was added and the chloride efflux was monitored for 5 min. At the end of the experiment, the vesicles were lysed with detergent to release all chloride ions and the resulting value was considered to represent a 100% release and used as such.

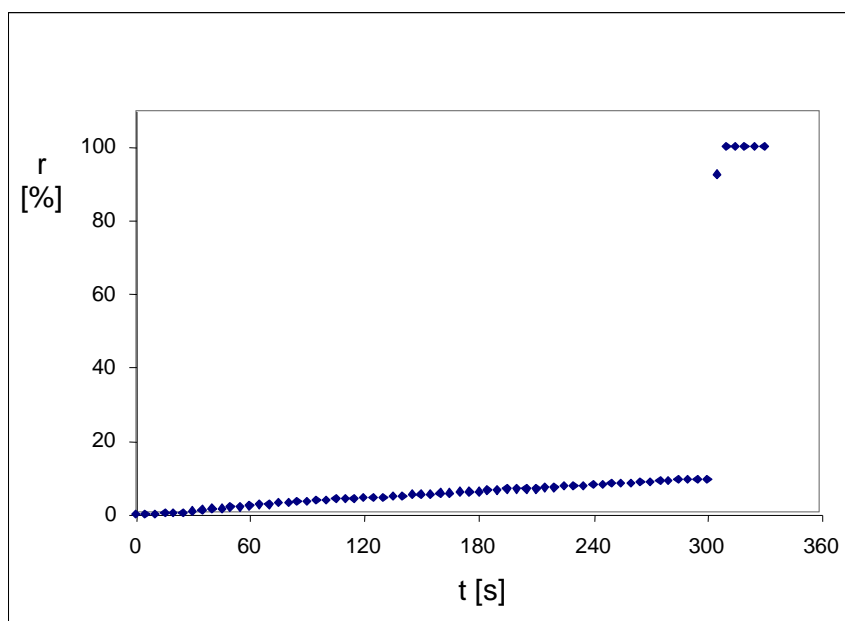

**Figure S18:** Chloride efflux upon addition of **1** (50  $\mu$ M, 10 mol-% carrier to lipid) to vesicles composed of 1-palmitoyl-2-oleoyl-*sn*-glycero-3-phosphocholine (POPC). The vesicles contained NaCl (476 mM NaCl and 10 mM phosphate buffer, pH 7.2) and were immersed in NaNO<sub>3</sub> (476 mM NaNO<sub>3</sub> and 10 mM phosphate buffer, pH 7.2). Once the electrode reading was stable the carrier was added and the chloride efflux was monitored for 5 min. At the end of the experiment, the vesicles were lysed with detergent to release all chloride ions and the resulting value was considered to represent a 100% release and used as such.

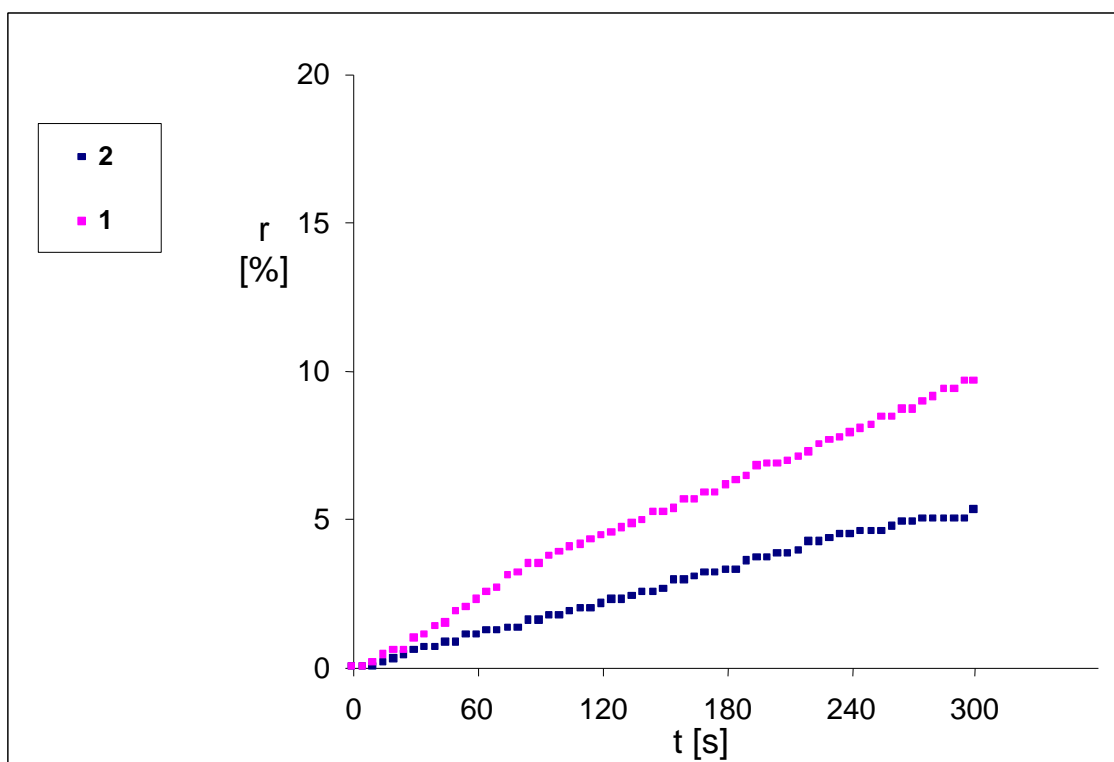

**Figure S19:** Comparison between chloride effluxes from chloride loaded liposomes promoted by the isophthalamides **1** and **2**.

## References

1. Kühl, C.; Lüning, U. *Tetrahedron Lett.* **1998**, *39*, 5735–5738. doi:10.1016/S0040-4039(98)01200-3
2. Kühl, C. Ph.D. Thesis; Christian-Albrechts-Universität zu Kiel, 1998.
